# Supplementary material for: In silicostudy of the binding of daunomycin and phenylalanine transfer RNA: probe molecular recognition for structure-based drug design
Source: Royal Society of Chemistry journal article supplement (doi:10.1039/d2me00236a), 2023-01-01
Supplement: d2me00236a1.pdf [file d2me00236a1.pdf]

**Table S1.** Eleven modified nucleotides that exist in the yeast tRNA<sup>Phe</sup>, and their corresponding three-letter codes and chemical structures.

| Modified nucleotide           | Three-letter code | Chemical structure                                                                    |
|-------------------------------|-------------------|---------------------------------------------------------------------------------------|
| m <sup>2</sup> G              | 2MG               | 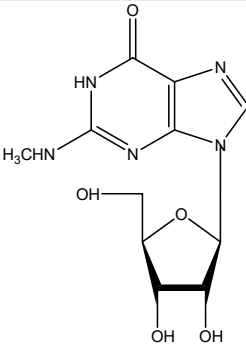    |
| D                             | DHU               |   |
| m <sup>2</sup> <sub>2</sub> G | DMG               |   |
| C <sub>m</sub>                | MRC               |  |

|                          |            |                                                                                      |
|--------------------------|------------|--------------------------------------------------------------------------------------|
| <p><math>G_m</math></p>  | <p>MRG</p> | 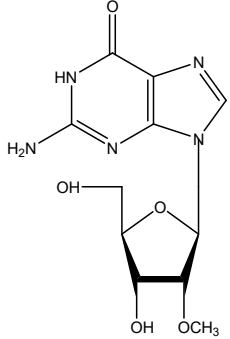  |
| <p>Y</p>                 | <p>WBG</p> |    |
| <p><math>\Psi</math></p> | <p>PSU</p> |  |
| <p><math>m^5C</math></p> | <p>5MC</p> |  |

|                       |            |                                                                                      |
|-----------------------|------------|--------------------------------------------------------------------------------------|
| <p>m<sup>7</sup>G</p> | <p>7MG</p> | 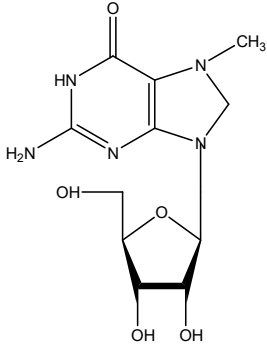   |
| <p>T</p>              | <p>5MU</p> |    |
| <p>m<sup>1</sup>A</p> | <p>1MA</p> |  |

**Table S2.** The selected atoms on DAU and the tRNA<sup>Phe</sup> for the five poses in the adaptive steered MD simulations.

| Poses | DAU     |           | RNA                            |           |
|-------|---------|-----------|--------------------------------|-----------|
|       | Atom ID | Atom name | Residue ID                     | Atom name |
| 1     | 18      | C9        | G <sub>15</sub>                | C4        |
| 2     | 12      | C5        | m <sup>5</sup> C <sub>49</sub> | C5        |
| 3     | 24      | C12       | G <sub>15</sub>                | C5        |
| 4     | 24      | C12       | G <sub>18</sub>                | C4        |
| 5     | 18      | C9        | A <sub>23</sub>                | C4        |

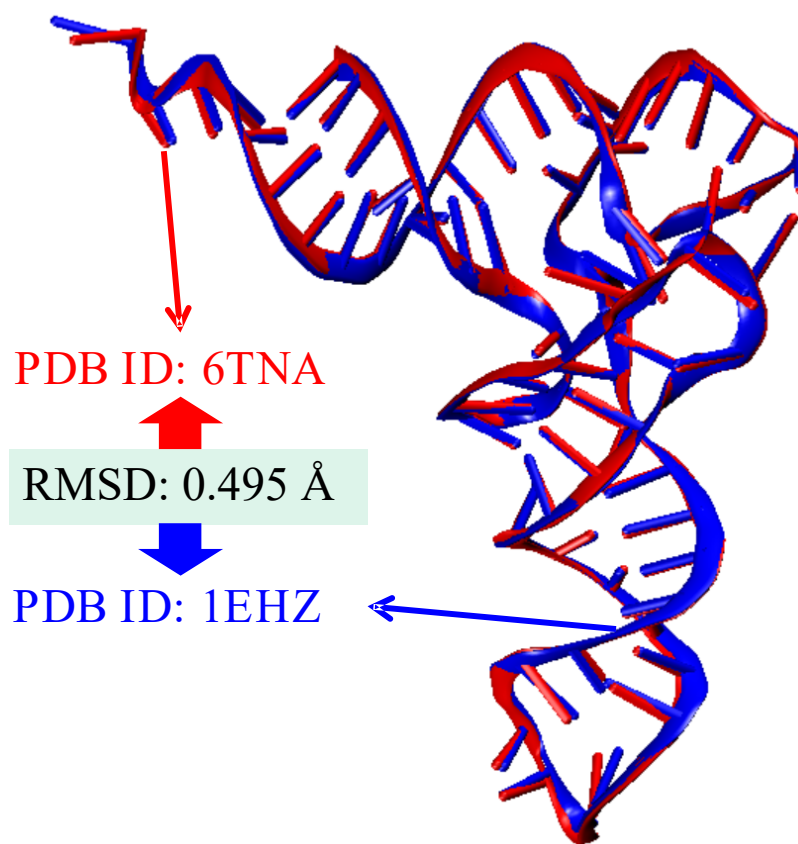

**Figure S1.** Calculation of backbone RMSD to compare the two crystal tRNA<sup>Phe</sup> structures.

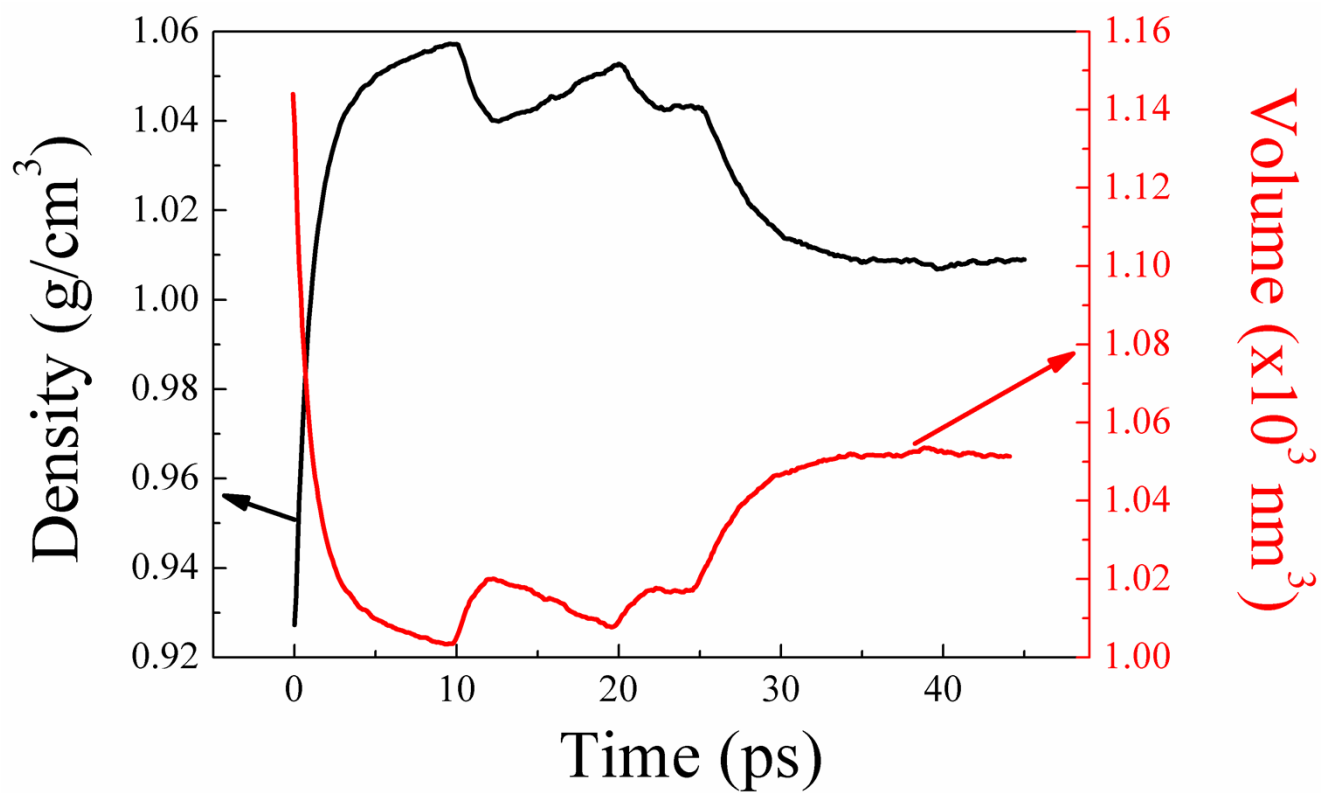

**Figure S2.** The changes of density (black) and volume (red) are monitored in the 45-ps NPT ensemble MD simulation to ensure that our simulation system reaches stable box sizes.

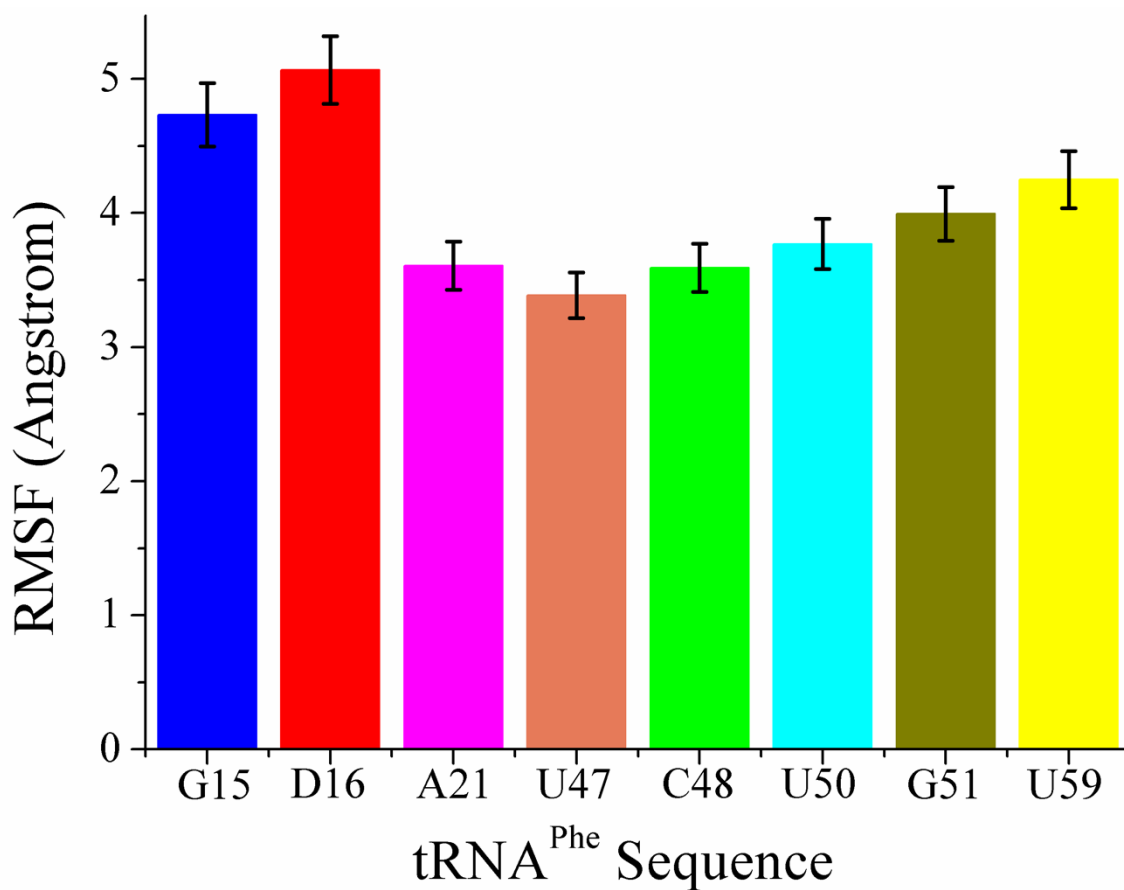

**Figure S3.** The RMSF values of the eight key nucleotides, *viz.* G<sub>15</sub>, D<sub>16</sub>, A<sub>21</sub>, U<sub>47</sub>, C<sub>48</sub>, U<sub>50</sub>, G<sub>51</sub> and U<sub>59</sub>, on the last 5-ns simulation trajectories of Pose 3. Small displacement deviations of the eight nucleotides indicate that our simulations have reached an equilibrated state after 150-ns conventional MD simulations.

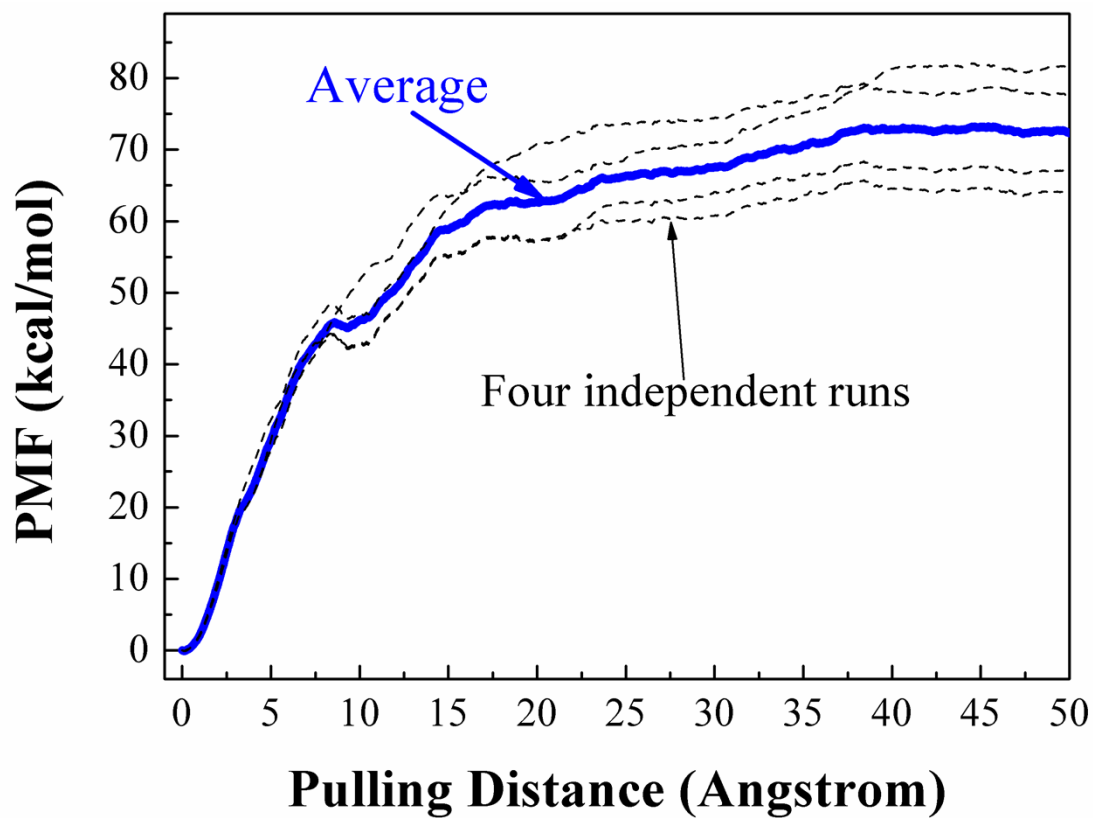

**Figure S4.** PMF profile of Pose 3 obtained by averaging four independent adaptive steered MD simulation runs.
